# Supplementary material for: Surface treatment by binary solvents induces the crystallization of a small molecular donor for enhanced photovoltaic performance
Source: Royal Society of Chemistry journal article supplement (doi:10.1039/c5cp05644f), 2015-11-20
Supplement: c5cp05644f1.pdf [file c5cp05644f1.pdf]

## Supporting Information

### Surface Treatment by Binary Solvents Inducing Crystallization of Small Molecular Donor for Enhanced Photovoltaic Performance

Weihua Zhou<sup>a,b</sup>, Yuanpeng Xie<sup>a</sup>, Xiaotian Hu<sup>a</sup>, Lin Zhang<sup>a</sup>, Xiangchuan Meng<sup>a</sup>,  
Yong Zhang<sup>b</sup>, Wei Ma<sup>\*c</sup>, Yiwang Chen<sup>\*a,b</sup>

<sup>a</sup>School of Material Science and Engineering/Institute of Polymers, Nanchang  
University, 999 Xuefu Avenue, Nanchang 330031, China

<sup>b</sup> College of Chemistry/Jiangxi Provincial Key Laboratory of New Energy Chemistry,  
Nanchang University, 999 Xuefu Avenue, Nanchang 330031, China

<sup>c</sup>State Key Laboratory for Mechanical Behavior of Materials, Xi'an Jiaotong  
University, 28 Xianning West Rd, Xi'an 710049, China

Corresponding author. Tel.: +86 791 83968703; fax: +86 791 83969561. E-mail:  
ywchen@ncu.edu.cn (Y. Chen); msewma@mail.xjtu.edu.cn (W. Ma)

Author contributions. Weihua Zhou and Yuanpeng Xie contributed equally to this  
work.

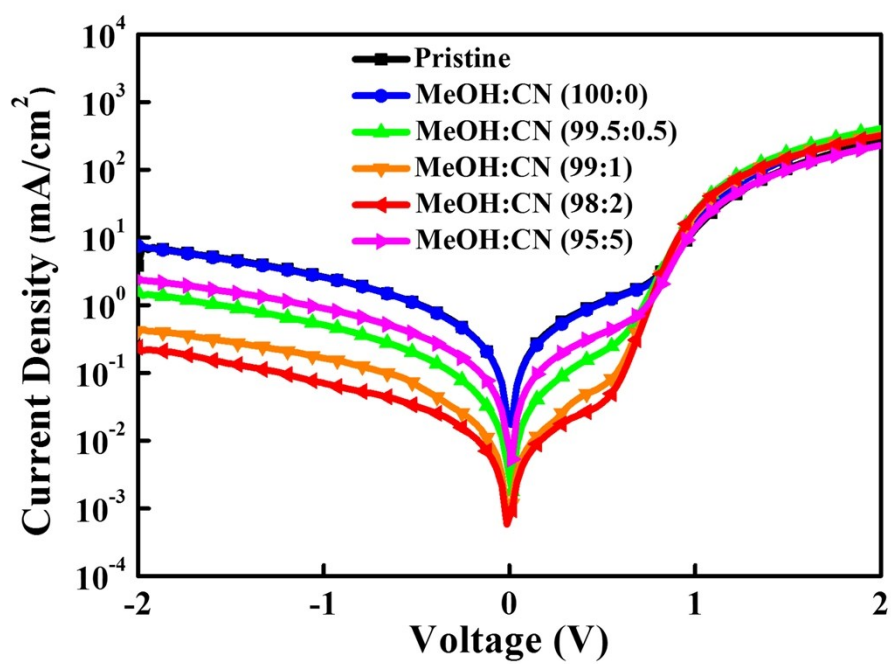

**Figure S1** Dark current-voltage ( $J$ - $V$ ) characteristics of solar cells based on blends after treating by MeOH:CN mixed solvents.

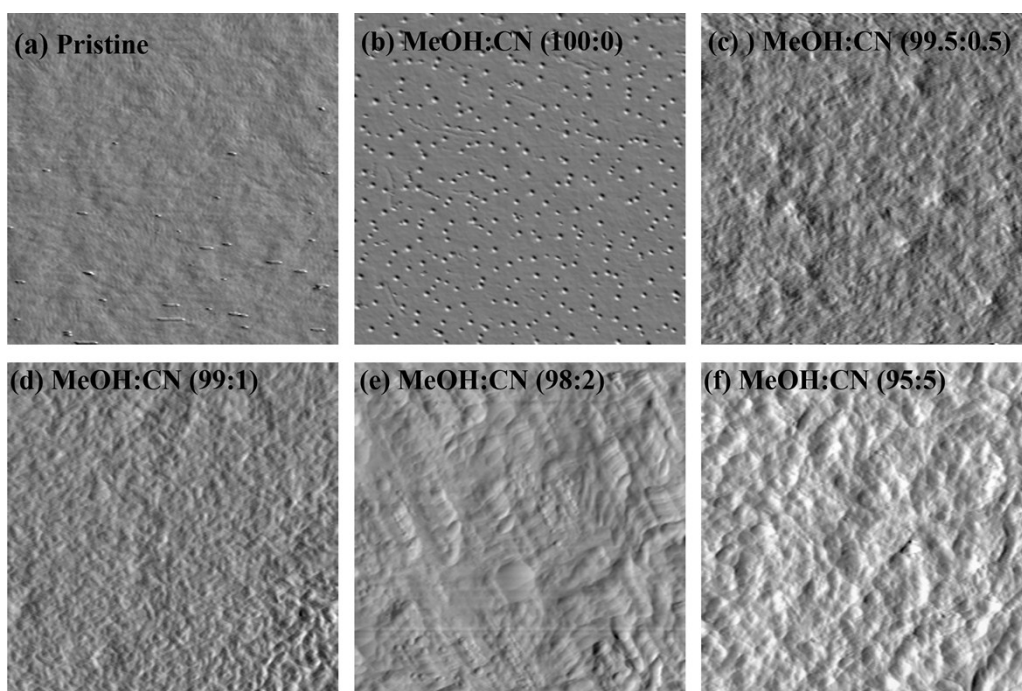

**Figure S2** Atomic force microscope (AFM) phase images of (a) pristine *p*-DTS(FBTTh<sub>2</sub>)<sub>2</sub>:PC<sub>71</sub>BM film, and films after treating by mixed solvents of (b) MeOH:CN (100:0), (c) MeOH:CN (99.5:0.5), (d) MeOH:CN (99:1), (e) MeOH:CN (98:2) and (f) MeOH/CN (95:5), respectively.

**Table S1** Parameters of the (100), (200), (300) and (010) diffraction signals determined from the out-of-plane and in-plane curves of pristine *p*-DTS(FBTTh<sub>2</sub>)<sub>2</sub>:PC<sub>71</sub>BM film and films after MeOH:CN solvent treatments.

|                                                                      | (100)                       |              | (200)                       |              | (300)                       |              | (010)                       |              |
|----------------------------------------------------------------------|-----------------------------|--------------|-----------------------------|--------------|-----------------------------|--------------|-----------------------------|--------------|
|                                                                      | <i>q</i> (Å <sup>-1</sup> ) | <i>d</i> (Å) |
| <i>p</i> -DTS(FBTTh <sub>2</sub> ) <sub>2</sub> :PC <sub>71</sub> BM |                             |              |                             |              |                             |              |                             |              |
| Pristine                                                             | 0.31                        | 20.2         | 0.52                        | 12.1         | 0.82                        | 7.7          | 1.72                        | 3.65         |
| MeOH:CN (100:0)                                                      | 0.31                        | 20.2         | 0.52                        | 12.1         | 0.82                        | 7.7          | 1.72                        | 3.65         |
| MeOH:CN (98:2)                                                       | 0.28                        | 22.4         | 0.58                        | 10.8         | 0.85                        | 7.4          | 17.2                        | 3.65         |
